# Supplementary material for: Radiofrequency ablation for peribiliary hepatocellular carcinoma: propensity score matching analysis
Source: Springer Nature journal article supplement (doi:10.1186/s13244-025-01919-5), 2025-02-19
Supplement: MOESM1 [file 13244_2025_1919_MOESM1_ESM.pdf]

# Radiofrequency ablation for peribiliary hepatocellular carcinoma: propensity score matching analysis

## ELECTRONIC SUPPLEMENTARY MATERIAL

**Supplementary Table 1.** Retreatment for the first recurrence of hepatocellular carcinoma after radiofrequency ablation

Abbreviations: PSM, propensity score matching; TACE, transcatheter arterial chemoembolization

|                                | Total cohort               |                                 |         | PSM cohort                 |                                |         |
|--------------------------------|----------------------------|---------------------------------|---------|----------------------------|--------------------------------|---------|
|                                | Peribiliary group (n = 73) | Non-peribiliary group (n = 106) | p-value | Peribiliary group (n = 73) | Non-peribiliary group (n = 71) | p-value |
| Curative therapies             | 26 (35.6%)                 | 46 (43.4%)                      | 0.353   | 26 (35.6%)                 | 29 (40.8%)                     | 0.607   |
| Ablation or combined with TACE | 23                         | 39                              |         | 23                         | 24                             |         |
| Surgical resection             | 3                          | 7                               |         | 3                          | 5                              |         |
| Noncurative therapies          | 47 (64.4%)                 | 60 (56.6%)                      |         | 47 (64.4%)                 | 42 (59.2%)                     |         |
| TACE                           | 31                         | 43                              |         | 31                         | 31                             |         |
| Systemic and other therapies   | 16                         | 17                              |         | 16                         | 11                             |         |

**Supplementary Table 2.** Complications after radiofrequency ablation between the patients treated with TACE and without TACE

|                                          | Total (n = 282) | Without TACE (n = 155) | With TACE (n = 127) | p-value |
|------------------------------------------|-----------------|------------------------|---------------------|---------|
| Complication                             | 127 (45.04%)    | 66 (42.58%)            | 61 (48.03%)         | 0.360   |
| Minor complication                       | 101 (35.82%)    | 51 (32.90%)            | 50 (39.37%)         | 0.260   |
| Major complication                       | 26 (9.22%)      | 15 (9.68%)             | 11 (8.66%)          | 0.769   |
| Intrahepatic bile duct dilatation        | 18 (6.38%)      | 12 (7.74%)             | 6 (4.72%)           | 0.302   |
| Mild Intrahepatic Bile Duct Dilatation   | 14 (4.96%)      | 9 (5.81%)              | 5 (3.94%)           | 0.472   |
| Severe Intrahepatic Bile Duct Dilatation | 4 (1.42%)       | 3 (1.94%)              | 1 (0.79%)           | 0.760   |
| Biloma formation                         | 1 (0.35%)       | 1 (0.65%)              | 0 (0.00%)           | 1.000   |
| Biliary fistula                          | 1 (0.35%)       | 1 (0.65%)              | 0 (0.00%)           | 1.000   |
| Postoperative liver decompensation       | 55 (19.50%)     | 30 (19.35%)            | 25 (19.69%)         | 0.944   |
| Thrombosis in peritumoral vessel         | 10 (3.55%)      | 5 (3.23%)              | 5 (3.94%)           | 1.000   |
| Pain required treatment                  | 19 (6.74%)      | 9 (5.81%)              | 10 (7.87%)          | 0.491   |
| Infection                                | 14 (4.96%)      | 7 (4.52%)              | 7 (5.51%)           | 0.702   |
| Hydropneumothorax require drainage       | 3 (1.06%)       | 2 (1.29%)              | 1 (0.79%)           | 1.000   |

Note: TACE, transcatheter arterial chemoembolization.
